# Supplementary material for: Remarkable effects of substitution on stability of complexes and origin of the C–H⋯O(N) hydrogen bonds formed between acetone's derivative and CO2, XCN (X = F, Cl, Br)
Source: Royal Society of Chemistry journal article supplement (doi:10.1039/c3ra47321j), 2014-01-01
Supplement: c3ra47321j1.pdf [file c3ra47321j1.pdf]

## Supplementary Information

### Remarkable effects of substitution on stability of complexes and origin of the C-H $\cdots$ O(N) hydrogen bonds formed between acetone's derivative and CO<sub>2</sub>, XCN (X = F, Cl, Br)

Ho Quoc Dai<sup>a</sup>, Nguyen Ngoc Tri<sup>a</sup>, Nguyen Thi Thu Trang<sup>b,c</sup>, Nguyen Tien Trung<sup>c,\*</sup>

<sup>a</sup>Faculty of Chemistry, and Laboratory of Computational Chemistry, Quy Nhon University, Quy Nhon, Vietnam

<sup>b</sup>Faculty of Science, Hai Phong University, Hai Phong, Vietnam

<sup>c</sup> Faculty of Chemistry, Hanoi National University of Education, Ha Noi, Vietnam

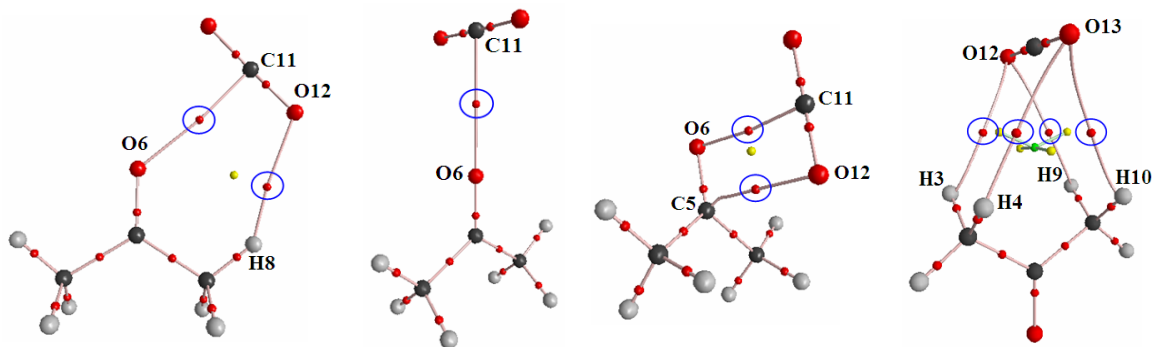

Figure S1. Topological geometries of four complexes **H1**, **H2**, **H3** and **H4**

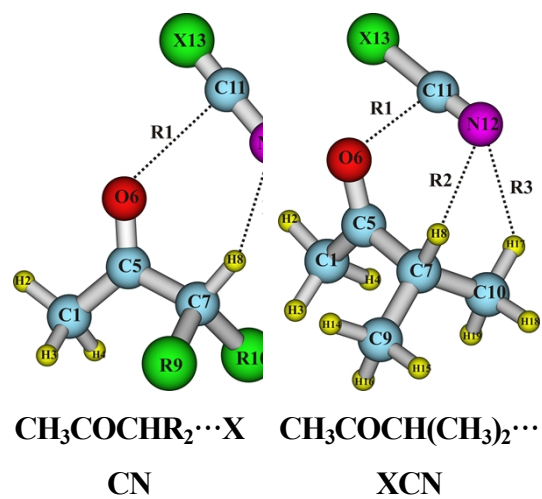

Figure S2. The stable geometric structures of the complexes between  $\text{CH}_3\text{COCHR}_2$  ( $\text{R} = \text{F}, \text{Cl}, \text{Br}$ ) and  $\text{XCN}$  ( $\text{F}, \text{Cl}, \text{Br}$ )

Table S1. Electron density and Laplacian at BCPs in the CH<sub>3</sub>COCH<sub>3</sub>⋯CO<sub>2</sub> complexes (all in electron)

|                            | H1     | H2     | H3     | H4     |
|----------------------------|--------|--------|--------|--------|
| ρ(>O6⋯C11)                 | 0.0093 | 0.0090 | 0.0084 |        |
| ρ(>O12⋯C5)                 |        |        | 0.0081 |        |
| ρ(O12⋯H8)                  | 0.0062 |        |        |        |
| ρ(O12⋯H3,9)                |        |        |        | 0.0041 |
| ρ(O13⋯H4,10)               |        |        |        | 0.0041 |
| ∇ <sup>2</sup> (>O6⋯C11)   | 0.0384 | 0.0435 | 0.0314 |        |
| ∇ <sup>2</sup> (>O12⋯C5)   |        |        | 0.0312 |        |
| ∇ <sup>2</sup> (O12⋯H8)    | 0.0218 |        |        |        |
| ∇ <sup>2</sup> (O12⋯H3,9)  |        |        |        | 0.0150 |
| ∇ <sup>2</sup> (O13⋯H4,10) |        |        |        | 0.0150 |

Table S2. Electron density and Laplacian at BCP of O⋯H and >C=O⋯C intermolecular contacts in the CH<sub>3</sub>COCHR<sub>2</sub>⋯CO<sub>2</sub> complexes (all in electron)

| R                        | CH <sub>3</sub> COCHR <sub>2</sub> ⋯CO <sub>2</sub> |                 |        |        |        |
|--------------------------|-----------------------------------------------------|-----------------|--------|--------|--------|
|                          | H                                                   | CH <sub>3</sub> | F      | Cl     | Br     |
| ρ(>O6⋯C11)               | 0.0093                                              | 0.0098          | 0.0081 | 0.0085 | 0.0086 |
| ρ(O12⋯H8)                | 0.0062                                              | 0.0054          | 0.0075 | 0.0095 | 0.0099 |
| ρ(O12⋯H17)               |                                                     | 0.0048          |        |        |        |
| ∇ <sup>2</sup> (>O6⋯C11) | 0.0384                                              | 0.0397          | 0.0332 | 0.0347 | 0.0350 |
| ∇ <sup>2</sup> (O12⋯H8)  | 0.0218                                              | 0.0196          | 0.0268 | 0.0342 | 0.0354 |
| ∇ <sup>2</sup> (O12⋯H17) |                                                     | 0.0176          |        |        |        |

Table S3. An NBO analysis for the CH<sub>3</sub>COCHR<sub>2</sub>⋯CO<sub>2</sub> complexes at MP2/6-311++G(2d,2p)

| R               | CH <sub>3</sub> COCHR <sub>2</sub> ⋯CO <sub>2</sub> |                      |                    |                                               |                                          |
|-----------------|-----------------------------------------------------|----------------------|--------------------|-----------------------------------------------|------------------------------------------|
|                 | EDT/e                                               | Δσ*(C7-H8)/e         | Δ% <i>s</i> (C7)   | E(n(O6)→π*(C11=O12,13)), kJ.mol <sup>-1</sup> | E(n(O12)→σ*(C7H8)), kJ.mol <sup>-1</sup> |
| H               | 0.0014                                              | 0.0009               | 0.34               | 6.5                                           | 2.3                                      |
| CH <sub>3</sub> | 0.0012                                              | 0.0004               | 0.12               | 6.4                                           | 1.0                                      |
|                 |                                                     | 0.0001 <sup>a)</sup> | 0.19 <sup>b)</sup> |                                               | 0.6*                                     |
| F               | -0.0002                                             | -0.0002              | 0.44               | 4.6                                           | 4.4                                      |
| Cl              | -0.0009                                             | -0.0003              | 0.61               | 5.1                                           | 4.8                                      |
| Br              | -0.0012                                             | -0.0002              | 0.66               | 5.1                                           | 5.2                                      |

<sup>a)</sup>for the C10-H17 bond and <sup>b)</sup>for the C10(H17) atom

Table S4. Electron density and Laplacian at BCP of O...H and >C=O...C intermolecular contacts in the CH<sub>3</sub>COCHR<sub>2</sub>...XCN complexes (all in electron)

| R                                          | CH <sub>3</sub> COCHR <sub>2</sub> ...FCN |                 |        |        |        |
|--------------------------------------------|-------------------------------------------|-----------------|--------|--------|--------|
|                                            | H                                         | CH <sub>3</sub> | F      | Cl     | Br     |
| ρ(>O6...C11)                               | 0.0104                                    | 0.0109          | 0.0095 | 0.0100 | 0.0101 |
| ρ(N12...H8)                                | 0.0075                                    | 0.0060          | 0.0092 | 0.0119 | 0.0125 |
| ρ(N12...H17)                               |                                           | 0.0056          |        |        |        |
| ∇ <sup>2</sup> (>O6...C11)                 | 0.0410                                    | 0.0422          | 0.0358 | 0.0375 | 0.0379 |
| ∇ <sup>2</sup> (N12...H8)                  | 0.0254                                    | 0.0200          | 0.0320 | 0.0413 | 0.0432 |
| ∇ <sup>2</sup> (N12...H17)                 |                                           | 0.0188          |        |        |        |
| CH <sub>3</sub> COCHR <sub>2</sub> ...ClCN |                                           |                 |        |        |        |
| ρ(>O6...C11)                               | 0.0074                                    | 0.0075          | 0.0068 | 0.0072 | 0.0072 |
| ρ(N12...H8)                                | 0.0077                                    | 0.0063          | 0.0098 | 0.0128 | 0.0134 |
| ρ(N12...H17)                               |                                           | 0.0059          |        |        |        |
| ∇ <sup>2</sup> (>O6...C11)                 | 0.0297                                    | 0.0290          | 0.0253 | 0.0264 | 0.0265 |
| ∇ <sup>2</sup> (N12...H8)                  | 0.0259                                    | 0.0210          | 0.0338 | 0.0443 | 0.0463 |
| ∇ <sup>2</sup> (N12...H17)                 |                                           | 0.0197          |        |        |        |
| CH <sub>3</sub> COCHR <sub>2</sub> ...BrCN |                                           |                 |        |        |        |
| ρ(>O6...C11)                               | 0.0072                                    | 0.0073          | 0.0065 | 0.0068 | 0.0068 |
| ρ(N12...H8)                                | 0.0079                                    | 0.0066          | 0.0101 | 0.0132 | 0.0137 |
| ρ(N12...H17)                               |                                           | 0.0061          |        |        |        |
| ∇ <sup>2</sup> (>O6...C11)                 | 0.0264                                    | 0.0265          | 0.0235 | 0.0245 | 0.0245 |
| ∇ <sup>2</sup> (N12...H8)                  | 0.0263                                    | 0.0218          | 0.0348 | 0.0456 | 0.0475 |
| ∇ <sup>2</sup> (N12...H17)                 |                                           | 0.0202          |        |        |        |

Table S5. An NBO analysis for all the complexes at MP2/6-311++G(2d,2p)

|                              | <b>CH<sub>3</sub>COCHR<sub>2</sub>···XCN</b> |                                         |                        |                                                                                     |                                                                               |
|------------------------------|----------------------------------------------|-----------------------------------------|------------------------|-------------------------------------------------------------------------------------|-------------------------------------------------------------------------------|
|                              | EDT/e                                        | $\Delta\sigma^*(\text{C7-H8})/\text{e}$ | $\Delta\%s(\text{C7})$ | $E(n(\text{O6}) \rightarrow \pi^*(\text{C11}=\text{N12})),$<br>kJ.mol <sup>-1</sup> | $E(n(\text{N12}) \rightarrow \sigma^*(\text{C7H8})),$<br>kJ.mol <sup>-1</sup> |
| R = H, X = F                 | 0.0021                                       | 0.0018                                  | 0.64                   | 8.4 (1.6)                                                                           | 3.4                                                                           |
| R = H, X = Cl                | -0.0026                                      | 0.0022                                  | 0.68                   | 3.5                                                                                 | 3.5                                                                           |
| R = H, X = Br                | -0.0025                                      | 0.0021                                  | 0.63                   | 3.3                                                                                 | 3.7                                                                           |
| R = CH <sub>3</sub> , X = F  | 0.0022                                       | 0.0005                                  | 0.26                   | 7.8 (1.5)                                                                           | 1.5                                                                           |
|                              |                                              | 0.0001 <sup>a)</sup>                    | 0.34 <sup>b)</sup>     |                                                                                     |                                                                               |
| R = CH <sub>3</sub> , X = Cl | -0.0024                                      | 0.0006                                  | 0.31                   | 3.3                                                                                 | 1.7                                                                           |
|                              |                                              | 0.0002 <sup>a)</sup>                    | 0.31 <sup>b)</sup>     |                                                                                     |                                                                               |
| R = CH <sub>3</sub> , X = Br | -0.0026                                      | 0.0006                                  | 0.33                   | 3.0                                                                                 | 2.1                                                                           |
|                              |                                              | 0.0002 <sup>a)</sup>                    | 0.31 <sup>b)</sup>     |                                                                                     |                                                                               |
| R = F, X = F                 | -0.0011                                      | 0.0003                                  | 0.86                   | 6.4 (1.0)                                                                           | 7.4                                                                           |
| R = F, X = Cl                | -0.0048                                      | 0.0008                                  | 0.94                   | 3.0                                                                                 | 7.5                                                                           |
| R = F, X = Br                | -0.0050                                      | 0.0009                                  | 0.97                   | 2.6                                                                                 | 7.7                                                                           |
| R = Cl, X = F                | -0.0033                                      | 0.0007                                  | 1.23                   | 6.9 (1.1)                                                                           | 11.0                                                                          |
| R = Cl, X = Cl               | -0.0077                                      | 0.0014                                  | 1.36                   | 3.2                                                                                 | 11.7                                                                          |
| R = Cl, X = Br               | -0.0081                                      | 0.0015                                  | 1.42                   | 2.8                                                                                 | 12.1                                                                          |
| R = Br, X = F                | -0.0039                                      | 0.0010                                  | 1.36                   | 7.1 (1.1)                                                                           | 11.3                                                                          |
| R = Br, X = Cl               | -0.0082                                      | 0.0017                                  | 1.48                   | 3.2                                                                                 | 11.5                                                                          |
| R = Br, X = Br               | -0.0085                                      | 0.0019                                  | 1.53                   | 2.7                                                                                 | 11.8                                                                          |

Note: The values in brackets for intermolecular hyperconjugation interaction  $E(n(\text{O6}) \rightarrow \pi^*(\text{C11}-\text{F13}))$ , <sup>a)</sup>for the C10-H17 bond and <sup>b)</sup>for the C10(H17) atom
